# Supplementary material for: Oseltamivir Ring Prophylaxis for Containment of 2009 H1N1 Influenza Outbreaks
Source: Atypon-hosted journal article supplement (doi:10.1056/nejmoa0908482), 2010-06-10
Supplement: nejm_lee_2166sa1.pdf [file nejm_lee_2166sa1.pdf]

## Supplementary Appendix

This appendix has been provided by the authors to give readers additional information about their work.

Supplement to: Lee VJ, Yap J, Cook AR, et al. Oseltamivir ring prophylaxis for containment of 2009 H1N1 influenza outbreaks. *N Engl J Med* 2010;362:2166-74.

## SUPPLEMENTARY APPENDIX

### Oseltamivir ring prophylaxis for containment of Influenza A (H1N1-2009) outbreaks

Vernon Lee et al

#### Laboratory Methods

##### Molecular Diagnosis

Nucleic acid material for each specimen was extracted using the DNA minikit (Qiagen, Inc, Valencia, CA, USA) according to manufacturer's instructions. Five  $\mu$ l of nucleic acid was subjected to PCR testing for H1N1-2009, according to the SWH1 Forward/Reverse primer set and probe (1). This one-step PCR was performed with the Superscript III RT/Platinum Taq mix (Invitrogen Corporation, CA, USA) on the real-time PCR system (Applied Biosystems 7500, USA).

The PCR thermocycling conditions were 50<sup>0</sup>C for 30mins, 95<sup>0</sup>C for 2min, followed by 45 cycles of PCR amplification of 95<sup>0</sup>C for 15sec and 55<sup>0</sup>C for 30sec. A florescence growth curve crossing the threshold line within 40 cycles is indicative of a positive result.

##### Molecular Sequencing

For the whole genome sequencing, viral RNA from the diagnostic swabs or RNA extracted from MDCK cell cultures was reverse-transcribed to cDNA and then amplified by PCR using H1N1-2009 specific primers. PCR products were sequenced using GIS flu-resequencing microarrays manufactured by Roche Nimblegen in an approach described previously (2,3). These sequences were used to generate phylogenetic trees and genetic relatedness using the Neighbour-Joining algorithm and Maximum Composite Likelihood Nucleotide Substitution model with 10,000 bootstrap replicates using the MEGA 4.0 software (4). More information on the genetic analysis tool can be found at <http://mendel.bii.a-star.edu.sg/METHODS/flumapIntro.html>.

#### Statistical Methods

Following the argument in Cauchemez et al (5), we assume that in the absence of control each case creates a number of new cases distributed as a Poisson variate with mean  $\lambda$ , and that the time between onset of the primary and all secondary cases are independently distributed with a discretised gamma distribution, which we parametrised from the posterior mean mean [sic] and variance of the gamma distribution fitted to the data provided by Moser (6). We further assume that after the intervention at time  $\tau$  (which varies by outbreak), the mean number of cases is  $\lambda\theta$ . By Rényi's splitting theorem (7), the number of new cases with onset on day  $j$  is Poisson with mean

$$\sum_{i \leq j} c_i \lambda \theta^{1\{j > \tau\}} w(i - j)$$

where  $c_t$  is the number of cases with onset on day  $t$ ,  $w(t)$  is the probability mass function for the generation interval of length  $t$ , and  $1\{A\} = 1$  if  $A$  is true and 0 otherwise. From this the likelihood function follows by taking the product of this over days and outbreaks. The posterior distribution of the parameters conditional on the data is taken to be proportional to this, i.e. a pseudo-objective improper flat prior on the parameters  $\lambda$  and  $\lambda\theta$  is assumed. Therefore this analysis was performed within

the Bayesian paradigm using improper flat priors on the parameter space – ie.  $p(\lambda, \theta) \propto 1$  if  $\lambda > 0$  and  $\theta > 0$ , and 0 otherwise; the likelihood function has a finite integral and so the posterior is proper (8).

The posterior distribution is estimated via Markov chain Monte Carlo integration (9). The hypothesis of an effect,  $\theta < 1$ , is assessed via posterior hypothesis probabilities (10) by direct calculation from the posterior sample of  $p(\theta > 1 | \text{data})$ . In the same fashion, marginal 95% credible intervals are obtained.

To distinguish the effects of ring prophylaxis from that of sending soldiers home for outbreak IV, we calculate the probability distribution of the fitted model from the start of interventions in which only one subsequent generation of contacts is allowed. These use the posterior mean for the secondary infection rate,  $\lambda$ , in the absence of control, and are derived via Monte Carlo simulation.

## References

1. World Health Organization. CDC protocol of realtime RT-PCR for influenza A (H1N1), 2009. (Accessed April 23, 2010, at <http://www.who.int/csr/resources/publications/swineflu/realtimeptpcr/en/index.html>).
2. Lee CW, Koh WH, Chan YS, et al. Large-scale evolutionary surveillance of the 2009 H1N1 influenza A virus using resequencing arrays. *Nucleic Acids Research*. 2010;38(9):e111.
3. Wong CW, Albert TJ, Vega VB, et al. Tracking the evolution of the SARS Coronavirus using rapid, high-throughput, high-density resequencing arrays. *Genome Res* 2004;14:398-405.
4. Tamura K, Dudley J, Nei M & Kumar S. MEGA4: Molecular Evolutionary Genetics Analysis (MEGA) software version 4.0. *Mol Biol Evol* 2007;24:1596-9.
5. Cauchemez S, Boëlle PY, Donnelly CA, et al. Real-time estimates in early detection of SARS. *Emerg Inf Dis* 2006;12:110-3.
6. Moser MR, Bender TR, Margolis HS, Noble GR, Kendal AP and Ritter DG. An outbreak of influenza aboard a commercial airliner. *Am J Epidemiol* 1979;110:1-6.
7. Rényi A. On two mathematical models of traffic on a divided highway. *J. Appl. Probab.* 1964;1:311–20.
8. Lee PM. *Bayesian Statistics: An Introduction*, 3ed. Wiley 2009.
9. Gilks WR, Richardson S, Spiegelhalter D. *Markov chain Monte Carlo in practice*. Chapman & Hall/CRC 1995.
10. Cook AR, Marion G, Butler A, Gibson GJ. Bayesian inference for the spatio-temporal invasion of alien species. *Bull Math Biol* 2007;69:2005–25.
